# Supplementary material
Source: PubMed Central journal article supplement (PMC8007185)
Supplement: mmc1.pdf [file mmc1.pdf]

**Has your facility experienced increased loss of staff (resignations) in the midst of COVID-19?**

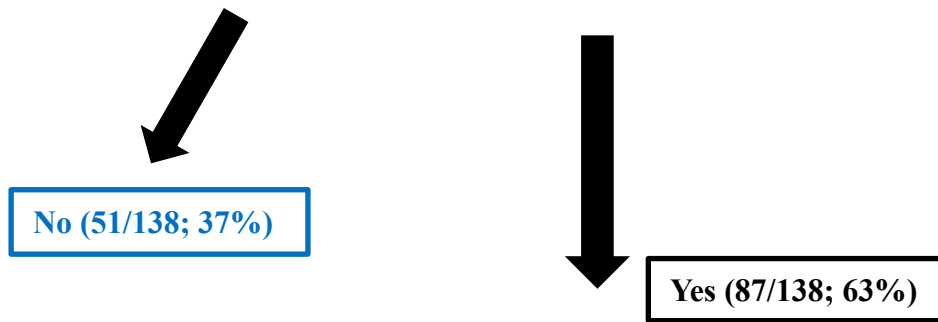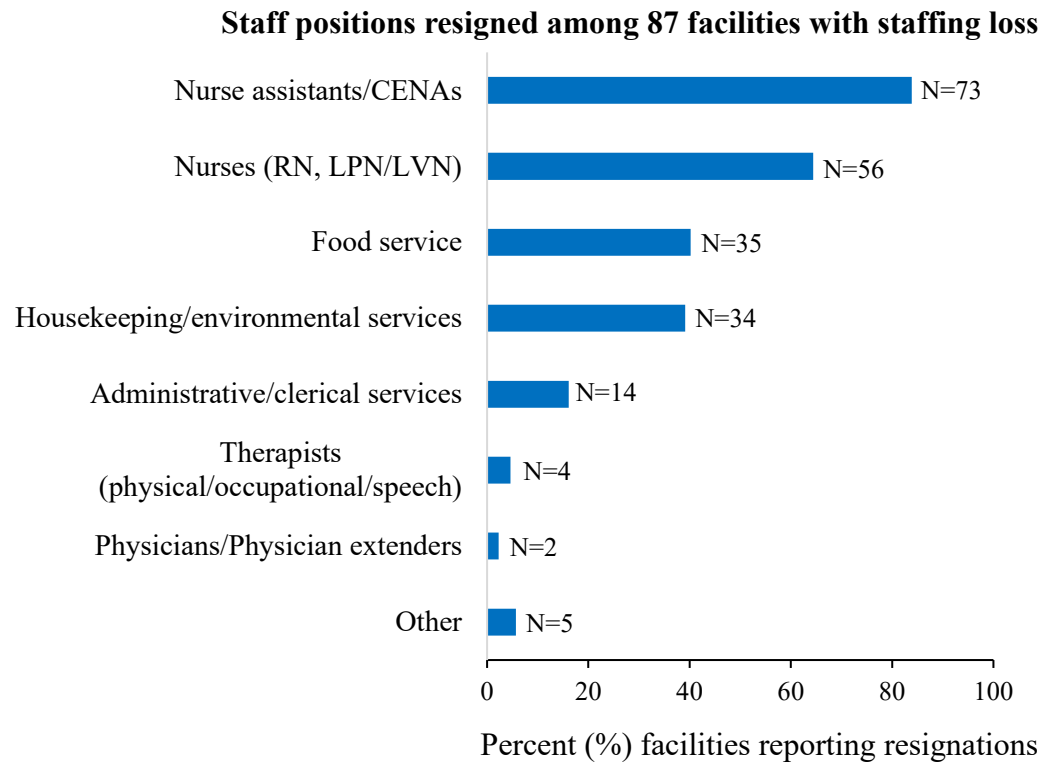

**Supplementary Figure S1. Staff Positions Resigning among Facilities with Staffing Losses**

Staff providing direct resident care represented the highest number of those leaving their facility during the pandemic.
