# Supplementary material
Source: PubMed Central journal article supplement (PMC8007185)
Supplement: mmc2.pdf [file mmc2.pdf]

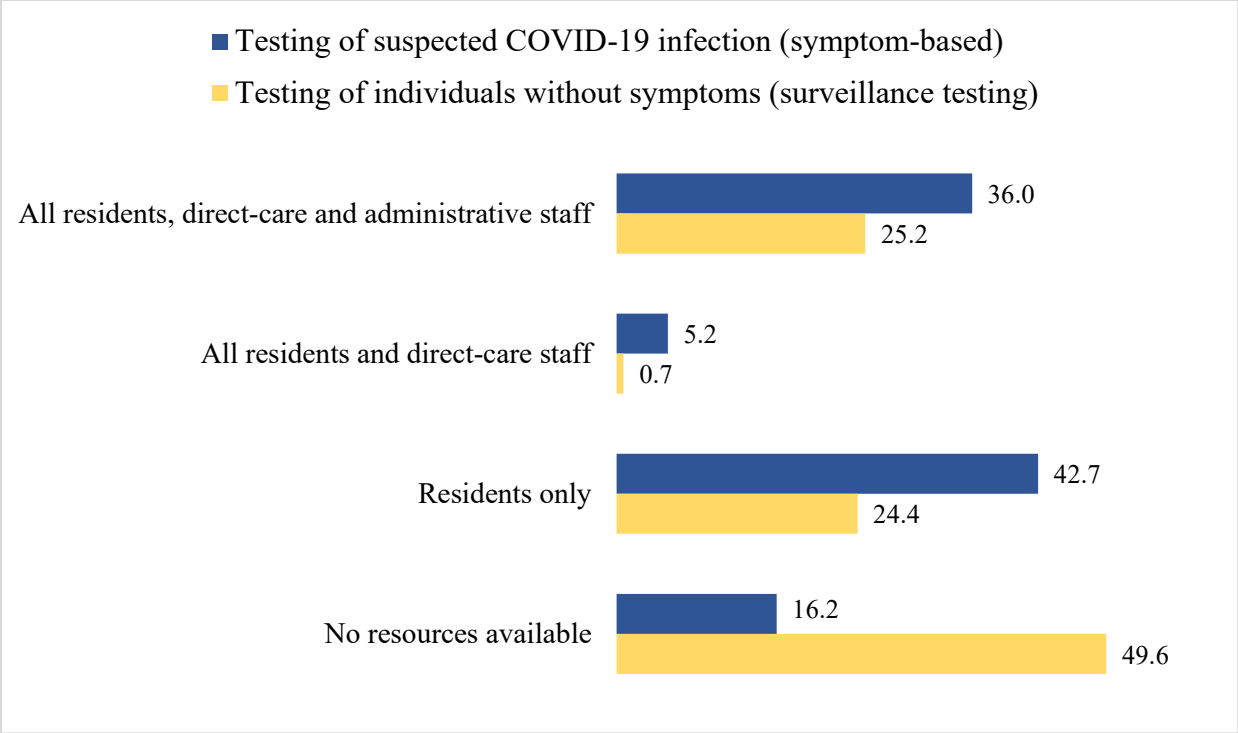

**Supplementary Figure S2. Testing Available at Facilities**

The ability for facilities to test their residents and staff varied, with facilities more often able to test those symptomatic and less likely to perform surveillance testing.
